## **Thermal niches of specialized gut symbionts: the case of social bees**

Tobin J. Hammer\*, Eli Le, Nancy A. Moran

Department of Integrative Biology, University of Texas at Austin, Austin, TX 78703

\*Corresponding author: [tobin.hammer@utexas.edu](mailto:tobin.hammer@utexas.edu)

Keywords: microbiome, *Apis*, *Bombus*, heat stress, thermoregulation, *Snodgrassella*

## 1 **Abstract**

2

3 Responses to climate change are particularly complicated in species that engage in  
4 symbioses, as the niche of one partner may be modified by that of the other. We explored  
5 thermal traits in gut symbionts of honeybees and bumblebees, which are vulnerable to rising  
6 temperatures. *In vitro* assays of symbiont strains isolated from 16 host species revealed variation  
7 in thermal niches. Strains from bumblebees tended to be less heat-tolerant than those from  
8 honeybees, possibly due to bumblebees maintaining cooler nests or inhabiting cooler climates.  
9 Overall however, bee symbionts grew at temperatures up to 44 °C and withstood temperatures up  
10 to 52 °C, at or above the upper thermal limits of their hosts. While heat-tolerant, most strains of  
11 the symbiont *Snodgrassella* grew relatively slowly below 35 °C, perhaps because of adaptation  
12 to the elevated body temperatures that bees maintain through thermoregulation. In a gnotobiotic  
13 bumblebee experiment, *Snodgrassella* was unable to consistently colonize bees reared below 35  
14 °C under conditions that limit thermoregulation. Thus, host thermoregulatory behavior appears  
15 important in creating a warm microenvironment for symbiont establishment. Bee-microbiome-  
16 temperature interactions could affect host health and pollination services, and inform research on  
17 the thermal biology of other specialized gut symbionts, such as those of humans.

18

## 19 **Introduction**

20

21 Earth's climate is rapidly warming, and there is an urgent need to understand how  
22 organisms will respond [1,2]. One factor complicating such predictions is the role of interspecific  
23 interactions [3,4], and, in particular, symbiosis [5,6]. Many organisms closely associate with one

24 or more distantly related partners that have highly distinct physiologies, as in the case of animal  
25 or plant hosts and their microbiomes. Hosts and microbes are likely to have different responses  
26 to temperature; yet, if they are mutually dependent, the combined niche is restricted to that of the  
27 more sensitive partner. Furthermore, thermal niches can themselves evolve in response to  
28 symbiotic lifestyles. For example, obligate endosymbionts that undergo strong population  
29 bottlenecks during transmission may evolve unstable, easily denatured proteins as a consequence  
30 of mutation accumulation, leading to heat sensitivity [7–9]. Both of these factors may constrain  
31 the combined thermal niche of strongly symbiont-dependent organisms [6,10,11]. There is  
32 evidence for symbiont-imposed constraints on host thermotolerance in a variety of invertebrates  
33 such as aphids, ants, stinkbugs, corals, and sponges [12–16]. However, the wider prevalence of  
34 this phenomenon is unclear, and, in general, we do not know how microbiomes will influence  
35 host responses to climate warming.

36         The eusocial corbiculate bees (hereafter “social bees”) are a particularly important group  
37 in which to study symbiont thermal niches and their effects on hosts. This clade, comprising  
38 honey bees (*Apis*), bumblebees (*Bombus*), and stingless bees (Meliponini), is host to anciently  
39 associated, host-specialized, and beneficial gut microbiomes [17,18]. Social bees are also key  
40 pollinators in both agricultural and natural ecosystems, but many are declining [19,20]. For  
41 bumblebees in particular, rising temperatures have been identified as a driver of range shifts and  
42 population declines in some species [21,22]. If gut symbionts are sensitive to heat stress, the  
43 microbiome could be one route through which climate change impacts bee health. Furthermore,  
44 because social bees as a whole exhibit extensive strain-level diversity in their microbiomes (e.g.,  
45 [17,23]), strain variability in thermotolerance could partially underlie corresponding variability  
46 among hosts, as was recently shown for endosymbionts of aphids [24].

47 Social bees present a uniquely complex thermal environment for their microbiome,  
48 making it challenging to predict their symbionts' thermal traits. They are not strictly  
49 poikilothermic; rather, they facultatively regulate the temperature of both their bodies (and  
50 individual body parts) as well as their shared nests [25–27]. These microenvironments are  
51 partially buffered from external fluctuations in temperature, but to a degree that is highly  
52 dynamic among individuals, over time and space, and across the bee phylogeny. Even within a  
53 single nest, the microbiome is distributed across individuals that vary in behaviors such as  
54 foraging or brood incubation, which involve changes in host body temperature [28–30].  
55 Furthermore, social bee species regulate their nest temperatures to different set-points and  
56 exhibit different overwintering strategies [27,31,32]. For example, the microbiomes of  
57 temperate-zone bumblebees must overwinter within diapausing queens, while the microbiome of  
58 *Apis mellifera* is transmitted by a cluster of active, heat-generating workers [33,34].

59 As in gut symbionts generally, symbionts of social bees experience a brief *ex vivo* phase  
60 during transmission, potentially imposing selection on thermal traits. The gut microbiome is  
61 transmitted via a fecal-oral route, usually between nestmates within a hive [35,36], but horizontal  
62 transmission between bee species has also been inferred [17,34]. Although the symbionts cannot  
63 grow under ambient oxygen levels outside the bee gut [18], the ability to tolerate thermal stress  
64 while on flowers or other external habitats could influence horizontal transmission rates and thus  
65 patterns of biogeography and host specificity. All of these factors add up to a complex selective  
66 landscape—even within a single host species—involving different castes, seasons, and *ex vivo*  
67 phases.

68 Very little is currently known about the thermal biology of social bee microbiomes.  
69 Recent work on *Bombus impatiens* has shown that, once established in the gut, core symbionts

70 are relatively robust to temperatures from 21–37 °C [37]. However, honeybees and bumblebees  
71 emerge largely symbiont-free as adults and must acquire their symbionts from nestmates  
72 [35,36,38]. It is not known if the colonization process, a crucial phase for both hosts and  
73 symbionts, is more temperature-sensitive than maintenance of an established symbiosis.  
74 Furthermore, there has been no comparative work investigating how symbiont thermal traits  
75 have evolved across social bees. Social bee taxa maintain different nest temperatures and use  
76 different strategies to overwinter and to establish new colonies. They also occupy a climatically  
77 diverse range of environments, from arctic and alpine habitats to tropical forests [39]. This  
78 variability may impose divergent selection on symbiont thermal traits, with potential feedbacks  
79 on the thermal tolerance of the hosts themselves.

80 We used common garden experiments (*in vitro*) to characterize symbiont thermal niches  
81 with a culture collection of *Snodgrassella* and *Gilliamella*, two bacterial species that are  
82 ubiquitous across honeybees and bumblebees [17]. Symbionts of these two bee lineages belong  
83 to deeply divergent clades and appear restricted to their native host [17,40]. We measured the  
84 thermal limits to growth from 12–48 °C, the ability to tolerate a brief heat exposure up to 52 °C,  
85 and growth rates at 28 °C versus 35 °C. 28 °C is within the range of brood nest temperatures  
86 reported for some bumblebee species [41,42] (though not all [43]), while honeybee brood nest  
87 temperatures are typically ~33–36 °C [31,32,44], at least for *Apis mellifera* and *A. cerana*.

88 We hypothesized that for all three metrics, honeybee-associated strains would exhibit  
89 higher thermotolerance than bumblebee-associated strains, as a result of adaptation to a generally  
90 warmer host (nests and bodies) and external environment. We also examined whether the  
91 thermal environment impacts *Snodgrassella* establishment in the bumblebee *Bombus impatiens*.  
92 This experiment examined whether the colonization process is particularly vulnerable to thermal

93 stress; our initial hypothesis was that an abnormally high ambient temperature for *B. impatiens*  
94 (35 °C) would impair symbiont acquisition. Our findings provide a foundation for future work on  
95 the thermal ecology of bee gut microbiomes and raise new questions about the role of host  
96 thermoregulatory behavior in mediating symbiosis.

97

## 98 **Materials & Methods**

99

### 100 *Culture collection*

101 Strains of *Snodgrassella alvi* and *Gilliamella* spp. used in this study were collected as  
102 described in refs. [40,45,46]. To our knowledge, no strains had undergone significant passaging  
103 in the lab since the original isolates were obtained, with the exception of *Snodgrassella alvi*  
104 strain wkB2. Bumblebee host species were categorized into high-elevation or low-elevation  
105 species for Figs. S1, S2 following range descriptions in ref. [47].

106

### 107 *Thermal limits assay*

108 From glycerol stocks, strains of *Snodgrassella* or *Gilliamella* were cultured on Columbia  
109 blood agar plates under 5% CO<sub>2</sub> and 35 °C for 2 d. These were then restreaked, and the overnight  
110 cultures were resuspended in Insectagro medium (Corning) and adjusted to an OD<sub>600</sub> of 0.5. We  
111 further diluted these cell suspensions 1/20 and spotted 10 µl in triplicate onto the surface of fresh  
112 Columbia plates. Negative controls (10 µl Insectagro spotted onto plates) were included to  
113 ensure there was no background contamination. Given that the same OD can correspond to  
114 different densities of viable cells, we also quantified the corresponding colony-forming unit  
115 (CFU) count of the inoculum for each strain. Plates were incubated at a range of temperatures

116 under 5% CO<sub>2</sub>, from 12–48 °C in increments of 4 °C. After 48 h, we scored these plates for  
117 whether visible biomass was present or absent. If a strain could not grow at or below 28 °C, it  
118 was not tested at colder temperatures. For example, strain wkB339 could not grow at 28 °C so it  
119 was not further tested at 24 °C or below.

120 We used logistic regression (implemented in R [48] as a generalized linear model with  
121 binomial error and logit link function), to test whether host genus (*Apis* vs. *Bombus*) predicted  
122 the ability of symbionts to grow at 44 °C, the upper thermal limit across strains in this assay. To  
123 account for the potential influence of starting inoculum size on the probability of growth, we  
124 used the same approach, but with log-transformed CFU counts for each strain as a predictor.

125

#### 126 *Heat stress assay*

127 *Snodgrassella* cultures were initially prepared as above. We then resuspended overnight  
128 cultures in Insectagro, adjusted them to an OD<sub>600</sub> of 0.5, and further diluted 1/20 in 200 µl in  
129 PCR plates. Cells were subjected to a 1 h heat stress treatment using a thermocycler with a  
130 temperature gradient from 35.4 °C to 51.6 °C (3 technical replicates per strain per temperature).  
131 They were then transferred to 96-well cell culture plates (Corning) in a microplate reader (Tecan)  
132 with 5% CO<sub>2</sub> and 35 °C. Growth was monitored by OD<sub>600</sub> readings taken every 3 h for 66 h. We  
133 included blank wells (Insectagro only) as negative controls and subtracted their OD<sub>600</sub> values  
134 from those of the cultures.

135

#### 136 *Thermal performance assay*

137 *Snodgrassella* cultures were prepared as for the heat stress assay, except that they were  
138 transferred directly into 96-well cell culture plates in the microplate reader (without the

139 thermocycler step) and incubated at either 28 °C or 35 °C for 72 h. We fit logistic curves to the  
140 data using the growthcurver package [49] and used a two-way ANOVA to test for effects of  
141 incubation temperature and host genus on the intrinsic growth rate ( $r$ ). Linear regression was  
142 used to test whether starting inoculum size (log-transformed CFU counts) predicted growth rate.

143

#### 144 *Colonization experiment*

145 To obtain gnotobiotic bumblebees, we collected clumps of pupal cocoons from four  
146 separate commercial colonies of *Bombus impatiens* (Koppert USA). We then surface-sterilized  
147 the clumps in diluted bleach (0.2% NaOCl) for 90 s as described previously [50,51] to minimize  
148 contamination of the emerging workers. We maintained the sterilized cocoon clumps in sterile  
149 conditions in a growth chamber at 35 °C and monitored them daily for adult emergence. Newly  
150 emerging adults were transferred to sterile vials and randomly assigned to *Snodgrassella* or  
151 buffer-only treatments. The former were fed with 10  $\mu$ l of filter-sterilized sugar syrup (50% v/v)  
152 containing  $\sim 10^6$  cells of *Snodgrassella alvi* strain wkB12, following [40]. We prepared new  
153 *Snodgrassella* inocula daily from overnight cultures; these were not continuously propagated but  
154 rather independently obtained from the same frozen stock of wkB12. Negative-control bees were  
155 fed an identical solution but without cells. All bees were monitored to ensure that they consumed  
156 the entire 10  $\mu$ l of inoculum.

157 We then transferred bees to sterilized 16 oz plastic containers (Dart Container Corp.) in  
158 groups of 2-3 as microcolonies [52]. Bees within a microcolony were assigned to the same  
159 treatment and were obtained from the same source colony. Each container was provided with 10  
160 ml of sterile 50% sugar syrup and 500 mg of sterile pollen dough (ground gamma-irradiated  
161 honeybee pollen mixed with sterile 50% sugar syrup). Microcolonies were reared in incubators at



162 29 °C, representing a typical bumblebee rearing temperature [37,52,53], or 35 °C, a temperature  
163 typical of *Apis mellifera* hives [32]. The pollen lump was replaced on the third day of rearing.

164 After 5 d, bees were briefly anaesthetized in ice and used for gut dissections. The gut  
165 (including hindgut and midgut) was removed from each bee, homogenized with a sterile plastic  
166 pestle, and resuspended in 1 ml of Insectagro. This homogenate was serially diluted and plated  
167 on Columbia blood agar. We counted CFUs after 2 d of incubation at 35 °C in 5% CO<sub>2</sub>. In  
168 performing CFU counts of the focal *Snodgrassella* strain, we noticed the occasional presence (in  
169 15% of bees overall) of an unidentified bacterium. This contaminant had distinct colony  
170 morphology and exhibited slow growth and hemolysis. There was no significant association  
171 between the inoculum or the rearing temperature with the presence of the contaminant (logistic  
172 regression; inoculum  $p = 0.19$ , temperature  $p = 0.066$ ). This may have been a core bee gut  
173 symbiont not completely removed from the cocoon surface by the sterilization treatment.

174 We used a linear mixed-effects model with the nlme package [54], treating colony source  
175 as a random effect, to test whether rearing temperature was associated with log-transformed  
176 *Snodgrassella* CFU counts. We also used logistic regression (as described above) to test whether  
177 bee survival was predicted by the inoculum treatment or by rearing temperature.

178

## 179 **Results**

180

181 We first used an *in vitro* assay to measure the temperature limits of growth of a collection  
182 of *Snodgrassella* and *Gilliamella* strains isolated from honeybees and bumblebees. While all  
183 strains could grow at 40 °C (Fig. S1) and none at 48 °C, they varied in their ability to grow at 44

184 °C (Fig. 1). Bumblebee strains were significantly less likely to be able to grow at this  
185 temperature than honeybee strains (logistic regression,  $p = 0.015$ ).

186       There was also substantial strain-level variation in lower thermal limits, especially for  
187 *Snodgrassella* (Fig. S1). However, probability of growth at the lowest temperature tested (12 °C)  
188 was positively associated with starting inoculum size (logistic regression,  $p = 0.0047$ ), which  
189 was not the case for growth at 44 °C (logistic regression,  $p = 0.74$ ). Hence, we regard the lower  
190 limit data as minimum estimates; many of these strains are likely to be able to grow at lower  
191 temperatures than indicated in Fig. S1, especially with larger starting inocula or a longer assay  
192 duration.

193       In addition to characterizing the heat-sensitivity of symbiont growth under a constant  
194 temperature, we also sought to determine the ability of bee gut symbionts to tolerate short-term  
195 exposure to more extreme heat. Exposure to temperatures above 35 °C for 1 h clearly delayed  
196 subsequent growth *in vitro* (Fig. 2). Overall, however, *Snodgrassella* appears to be quite heat-  
197 tolerant in that all six strains assayed could recover from exposure to 48.7 °C. The exact limit  
198 was variable among strains. Although larger strain sample sizes are needed for a conclusive  
199 comparison, the three *Apis*-associated strains tended to be slightly more heat-tolerant than the  
200 three *Bombus*-associated strains (Fig. 2). Strain robustness to short-term exposures was not  
201 simply a function of the initial inoculum size. For example, the only two strains that could  
202 recover following exposure to 51.6 °C, wkB9 and wkB237, had the lowest inoculum sizes.

203       Even when thermal limits do not vary among symbiont strains, the thermal optima could  
204 vary. To address this, we conducted *Snodgrassella* growth assays in liquid media at 28 °C and 35  
205 °C, representing temperatures closer to typical *Bombus* or *Apis* nest temperatures, respectively.  
206 Inoculum size (number of CFUs at the start of the growth assay) did not predict growth rate at

207 either 28 °C or 35 °C (linear regression,  $p = 0.69$  and  $0.82$ , respectively). Interestingly,  
208 bumblebee-associated *Snodgrassella* typically had higher growth rates than honeybee-associated  
209 *Snodgrassella* (Fig. 3; two-way ANOVA,  $p = 0.0085$ ). We found no significant interaction  
210 between host genus and temperature (two-way ANOVA,  $p = 0.24$ ), as would be expected if  
211 symbiont growth were differentially adapted to the temperatures closest to those of their hosts'  
212 nests. Instead, growth rates of most strains were higher at 35 °C (Fig. 3; two-way ANOVA,  $p =$   
213  $0.0059$ ). Among bumblebee strains, those from host species inhabiting higher elevations were  
214 not conspicuously better able to grow at the cooler temperature, 28 °C, than those from low-  
215 elevation hosts (Fig. S2). In fact, the only strains that exhibited higher growth rates at 28 °C than  
216 at 35 °C were derived from *Apis mellifera* (Fig. S2).

217 We next examined whether symbiont thermotolerance might influence fitness *in vivo*  
218 using a colonization experiment with *Snodgrassella alvi* strain wkB12 and gnotobiotic  
219 bumblebees. *In vitro*, this strain grows much more quickly at 35 °C as compared with 28 °C (Fig.  
220 4B). No *Snodgrassella* colony-forming units (CFUs) were detected in any of the bees inoculated  
221 with sterile buffer (N = 15 reared at 29 °C, N = 16 reared at 35 °C). Among bees inoculated with  
222 a standardized dose of  $\sim 10^6$  *Snodgrassella* cells, gut colonization after 5 days was highly  
223 dependent on the thermal environment (Fig. 4A). Accounting for the different source colonies  
224 from which bees were obtained, CFU counts were significantly higher (by over 50-fold,  
225 comparing medians) in the 35 °C rearing treatment (linear mixed-effects model,  $p < 0.0001$ ).  
226 Several bees reared at 29 °C had no detectable *Snodgrassella* cells.

227 We also examined whether bee survival was influenced by the experimental treatments.  
228 Overall, 92% of bees survived from adult emergence to dissection on day 5. The probability of  
229 survival was not affected by the inoculum (*Snodgrassella* vs. buffer alone) or the rearing

230 temperature (logistic regression; inoculum  $p = 0.49$ , temperature  $p = 0.33$ ) (Fig. S3). As only  
231 bees that survived for the entire 5-day rearing period were used for CFU counts, we were not  
232 able to examine whether gut colonization was predictive of survival.

233

## 234 Discussion

235

236 We first used *in vitro* assays to characterize bee symbiont thermal niches in a common  
237 environment and without potential host-mediated effects. The experiments were based on a  
238 collection of isolates of *Snodgrassella* and *Gilliamella*, which are ubiquitous, keystone members  
239 of the social bee gut microbiome [17,18]. Overall, we found that these symbionts are quite heat-  
240 tolerant relative to their hosts. All strains of both symbiont species can grow at a constant  
241 temperature of 40 °C, and many can grow at 44 °C (Fig. 1). Likewise, another core symbiont,  
242 *Lactobacillus bombicola*, has an optimal growth temperature around 40 °C [55]. In contrast,  
243 honeybees and bumblebees do not normally allow their nests to reach temperatures above 35 °C,  
244 which would harm brood development [31,32,41–43,56].

245 Bees can, however, maintain higher body temperatures for brief periods while foraging.  
246 For example, the abdomen (which contains the gut microbes [18]) of bumblebees foraging in full  
247 sunlight may reach close to 40 °C [28]. The abdomen is also used to dissipate excess heat  
248 generated in the thorax [57]. We used short-term heat treatments of *Snodgrassella* to mimic this  
249 kind of temporary exposure, and found that bumblebee-associated strains could recover from an  
250 hour-long exposure to at least 48.7 °C, while honeybee-associated strains could recover from at  
251 least 50.4 °C (Fig. 2). In contrast, measured lethal limits (broadly defined) of bumblebees and  
252 honeybees are similar or lower, around ~40–46 °C [58,59] and ~50 °C [60–62], respectively.

253 Bumblebees have experienced population declines partly linked to climate warming  
254 [21,22]; in this study, we asked whether heat-sensitive symbionts could constitute one underlying  
255 mechanism. The comparative robustness of *Snodgrassella*, *Gilliamella*, and *Lactobacillus*  
256 *bombicola* to high temperatures *in vitro* suggests that the gut microbiome does not constrain bee  
257 tolerance of heat. Rather, other factors rooted in host physiology, behavior, and ecology likely  
258 explain the observed impacts of climate change on bumblebee populations [63–65]. However,  
259 further experiments *in vivo* are needed to conclusively test whether the microbiome plays a role  
260 in mediating effects of heat stress on bee populations.

261 *Snodgrassella* and *Gilliamella* are heat-tolerant not only compared to their hosts, but also  
262 compared to many insect endosymbionts. For example, aphids, weevils, carpenter ants, and  
263 stinkbugs all have obligate associations with highly heat-sensitive endosymbionts  
264 [10,13,14,24,66]. One trait these symbionts share is strict maternal inheritance; this transmission  
265 mode enforces a clonal population structure that results in genome degeneration and, ultimately,  
266 impaired heat tolerance [7–9]. In contrast, social transmission of gut symbionts permits the strain  
267 mixing and recombination that is more typical for free-living bacteria. While mostly vertically  
268 transmitted between colonies, bee gut symbionts likely maintain larger population sizes and  
269 undergo recombination more frequently than endosymbionts. All bee gut symbiont species are  
270 culturable outside the host [67] and possess genomes that do not exhibit the hallmarks of  
271 degenerative evolution [40].

272 Like many gut microbes, bee gut symbionts experience a brief but potentially important  
273 *ex vivo* phase during transmission. Selection for persistence on nest substrates or in the  
274 environment (e.g., flowers) may influence their heat tolerance. *In vivo* selective pressures related  
275 to the unique thermoregulatory behavior of social bees may further explain the broad thermal

276 range of bee symbionts. A bee-inhabiting microbial population will experience a wide range of  
277 body temperatures as its hosts forage in the environment, thermoregulate nests, and overwinter.  
278 In the future, comparisons to non-bee-associated bacterial relatives (e.g., [68]) would be useful to  
279 reconstruct how evolution in social bees specifically has shaped the thermal niches of the bee gut  
280 microbiome.

281 While generally heat-tolerant relative to their hosts and to other bacterial symbionts of  
282 insects, *Snodgrassella* and *Gilliamella* strains do vary in thermal traits. This variability manifests  
283 as higher heat tolerance for honeybee versus bumblebee strains (Fig. 1, Fig. 2), a pattern that  
284 roughly matches the corresponding thermal traits of their hosts. For example, honeybees  
285 typically occupy tropical and subtropical environments (with the exception of introduced *Apis*  
286 *mellifera*), maintain warmer nests, have higher upper thermal limits, and do not undergo  
287 diapause in winter [26,62,69]. Our findings are consistent with previously observed correlations  
288 between symbiont thermotolerance and the local thermal environment [24,70–72]. In the case of  
289 bees, even if divergent thermal niches of symbionts do not affect hosts, they could affect the  
290 potential for strains to successfully disperse between host colonies or even species, ultimately  
291 influencing their biogeography and degree of host specialization.

292 Surprisingly, we did not find such host-symbiont matching for *Snodgrassella* thermal  
293 performance (i.e., relative growth rate at two temperatures). Bumblebee strains uniformly grew  
294 faster at 35 °C, while most *Apis mellifera* strains grew slightly faster at 28 °C (Fig. 3, Fig. S2).  
295 This pattern is the opposite of what would be expected if the ambient temperature in active  
296 colonies primarily determines the optimal growth temperature of symbionts, because honeybees  
297 generally maintain warmer nests. We speculate that overwintering biology may explain the *A.*  
298 *mellifera*-derived strains' comparatively higher growth rates at the cool assay temperature.

299 Unlike bumblebees, in winter, *A. mellifera* workers form active clusters that maintain above-  
300 ambient, but cool temperatures (average ~21 °C; [32]).

301         What explains our observation that bumblebee-associated *Snodgrassella*, like  
302 *Lactobacillus bombicola* [55], grow faster at a temperature exceeding that of their nests (Fig. 3)?  
303 We suggest that the answer lies in the bee abdomen—the microenvironment inhabited by the  
304 symbionts, and a structure whose temperature is affected by host thermoregulatory behavior.  
305 Specifically, both workers and queens (and occasionally males [73]) of bumblebees incubate  
306 larvae and pupae by placing their abdomen directly onto brood structures and elevating its  
307 temperature to ~35 °C or above, exceeding ambient temperatures in the nest [74,75]. Given that  
308 bumblebees spend much of their time performing this behavior [41,74,76]—especially foundress  
309 queens, the sole source of microbes for the colony—symbiont growth may be adapted to the  
310 locally heated conditions within the abdomen.

311         To further explore this possibility, we tested whether the warm-shifted growth preference  
312 of bumblebee-associated *Snodgrassella* (Fig. 3) might have fitness effects *in vivo*. We conducted  
313 an experiment on gnotobiotic *Bombus impatiens*, using conditions (microcolonies lacking brood)  
314 in which incubation behavior is limited, and thus abdominal temperatures are expected to more  
315 closely match the chosen ambient rearing temperatures (29 °C and 35 °C). Previous literature  
316 hinted that these temperatures might affect *Snodgrassella* colonization of *B. impatiens*. In one  
317 study, experimental inoculation of *Bombus impatiens* with *Snodgrassella* resulted in 100%  
318 colonization and consistently high titers [40], whereas a later study of *B. impatiens* reported  
319 erratic colonization and frequently low titers [51]. These studies differed in the temperature at  
320 which bees were reared, with the high colonization rate observed at 34 °C and erratic  
321 colonization at ~26 °C. In line with these previous studies, when we directly examined the effect

322 of the thermal environment on *Snodgrassella* colonization, we found that colonization was  
323 variable and occasionally unsuccessful in bees reared at 29 °C (Fig. 4A).

324 One possible explanation for this result has to do with the fact that the focal strain used,  
325 *Snodgrassella alvi* wkB12, was not isolated from *B. impatiens* but rather *B. bimaculatus*. If  
326 bumblebees control colonization by other species' or even colonies' symbiont strains, as has  
327 been suggested [51], robust colonization at 35 °C may actually reflect a weakening of strain-  
328 specific filtering mechanisms at this unnaturally high rearing temperature. However, we  
329 currently lack evidence for such mechanisms.

330 Another explanation for this result is based in the thermal niche of bumblebee-associated  
331 *Snodgrassella* strains. *Snodgrassella alvi* wkB12, like the others tested, grows more quickly at  
332 35 °C than 28 °C *in vitro* (Fig. 4B). In bees reared in microcolonies at 29 °C—which we expect  
333 to have similar abdominal temperatures because of restricted thermoregulatory behavior—  
334 ingested *Snodgrassella* cells may simply be unable to replicate quickly enough to establish a  
335 stable population before being lost to defecation. However, once established, they appear to be  
336 quite robust to a wide range of temperatures [37]. A subset of bees reared at 29 °C did acquire  
337 high *Snodgrassella* titers that exceeded the number of cells in the inoculum, implying replication  
338 in the gut (Fig. 4A). One possibility is that these individuals had begun to incubate the provided  
339 pollen lump, a behavior which has been observed in microcolonies (e.g., [77]). As a  
340 consequence, they may have maintained higher abdominal temperatures conducive to  
341 *Snodgrassella* colonization. Analogously, in a normal bumblebee nest, individual-level  
342 thermoregulatory behaviors may be important in enabling establishment of the gut microbiome.

343 We note that our *in vitro* and *in vivo* experiments were conducted on single isolates, which  
344 enables controlled assays of strain-level thermotolerance but may miss important community



345 interactions that occur within the bee gut. Microbial thermotolerance can be modified by co-  
346 occurring microbes or viruses (e.g., [78–81]), and phage have recently been documented from  
347 the bee gut microbiome [82,83]. Community interactions may also help explain why  
348 monocolonizations of *Snodgrassella* into bees reared at 29 °C or below have been erratic (Fig.  
349 4A and [51]), while fecal transplants at these temperatures have not [36,50]. Another difference  
350 between *Snodgrassella* colonization from cultured isolates and from fecal transplants is in the  
351 quantity and physiological state of the cells that bees ingest. These factors could also help  
352 symbionts overcome a temperature barrier to gut colonization.

353

## 354 **Conclusions**

355

356 We have argued that the gut microbiome is probably not a major constraint on how social  
357 bees respond to heat stress. However, as their growth is somewhat cold-sensitive, symbionts  
358 could be affected by other kinds of environmental stressors that disrupt host thermoregulatory  
359 behavior. For example, neonicotinoid pesticides interfere with *B. impatiens* thermoregulation  
360 [84]. Pesticides could thus indirectly affect colonization by *Snodgrassella* and perhaps other key  
361 symbionts, a process we have shown to be temperature-sensitive. Whether symbionts indeed  
362 constrain (or even improve [85]) bee responses to heat and other stressors remains an important  
363 priority for future research, as bees and the pollination services they provide continue to face  
364 serious challenges.

365 Our findings are also relevant beyond bees. We have identified a potential feedback  
366 between host behavior and the microbiome, a topic that has recently garnered substantial interest  
367 [86,87]. Specifically, we suggest that social bee thermoregulatory behaviors have provided

368 elevated and buffered microenvironments (nests and individual bodies), shaping the evolution of  
369 their symbionts' thermal niches. Additionally, there are parallels between bees and mammals,  
370 which also create warm gut environments and harbor socially transmitted gut symbionts. Bees  
371 could be a useful model to understand how these factors influence symbiont thermotolerance, a  
372 little-studied trait in humans and other mammals.

373

### 374 **Data Availability**

375

376 Primary data and R code used for analyses and visualizations are publicly available at the  
377 figshare repository: <https://doi.org/10.6084/m9.figshare.12486395>.

378

### 379 **Acknowledgments**

380

381 This research was supported by a postdoctoral fellowship (2018-08156) from the USDA  
382 National Institute of Food and Agriculture to TJH, a University of Texas Undergraduate  
383 Research Fellowship to EL, and National Institutes of Health award (R35GM131738) to NAM.  
384 We also thank S. Leonard and E. Powell for helpful advice and K. Hammond for assistance.

385

386

387 **References**

388

389 1. Cahill AE *et al.* 2013 How does climate change cause extinction? *Proc. R. Soc. B* **280**,  
390 20121890. (doi:10.1098/rspb.2012.1890)

391 2. Urban MC. 2015 Accelerating extinction risk from climate change. *Science* **348**, 571–573.  
392 (doi:10.1126/science.aaa4984)

393 3. Harrington R, Woiwod I, Sparks T. 1999 Climate change and trophic interactions. *Trends in*  
394 *Ecology & Evolution* **14**, 146–150. (doi:10.1016/S0169-5347(99)01604-3)

395 4. Colwell RK, Dunn RR, Harris NC. 2012 Coextinction and Persistence of Dependent Species  
396 in a Changing World. *Annual Review of Ecology, Evolution, and Systematics* **43**, 183–203.  
397 (doi:10.1146/annurev-ecolsys-110411-160304)

398 5. Kiers TE, Palmer TM, Ives AR, Bruno JF, Bronstein JL. 2010 Mutualisms in a changing  
399 world: an evolutionary perspective. *Ecology Letters* **13**, 1459–1474. (doi:10.1111/j.1461-  
400 0248.2010.01538.x)

401 6. Wernegreen JJ. 2012 Mutualism meltdown in insects: bacteria constrain thermal adaptation.  
402 *Current Opinion in Microbiology* **15**, 255–262. (doi:10.1016/j.mib.2012.02.001)

403 7. Melnikov SV, van den Elzen A, Stevens DL, Thoreen CC, Söll D. 2018 Loss of protein  
404 synthesis quality control in host-restricted organisms. *Proc Natl Acad Sci USA* **115**, E11505–  
405 E11512. (doi:10.1073/pnas.1815992115)

- 406 8. Fares MA, Ruiz-González MX, Moya A, Elena SF, Barrio E. 2002 GroEL buffers against  
407 deleterious mutations. *Nature* **417**, 398–398. (doi:10.1038/417398a)
- 408 9. Moran NA, McCutcheon JP, Nakabachi A. 2008 Genomics and Evolution of Heritable  
409 Bacterial Symbionts. *Annual Review of Genetics* **42**, 165–190.  
410 (doi:10.1146/annurev.genet.41.110306.130119)
- 411 10. Corbin C, Heyworth ER, Ferrari J, Hurst GDD. 2017 Heritable symbionts in a world of  
412 varying temperature. *Heredity* **118**, 10–20. (doi:10.1038/hdy.2016.71)
- 413 11. Moran NA. 2016 When obligate partners melt down. *mBio* **7**, 7–9.  
414 (doi:10.1128/mBio.01904-16)
- 415 12. Dunbar HE, Wilson ACC, Ferguson NR, Moran NA. 2007 Aphid thermal tolerance is  
416 governed by a point mutation in bacterial symbionts. *PLoS Biology* **5**, e96.  
417 (doi:10.1371/journal.pbio.0050096)
- 418 13. Fan Y, Wernegreen JJ. 2013 Can't Take the Heat: High Temperature Depletes Bacterial  
419 Endosymbionts of Ants. *Microb Ecol* **66**, 727–733. (doi:10.1007/s00248-013-0264-6)
- 420 14. Kikuchi Y, Tada A, Musolin DL, Hari N, Hosokawa T, Fujisaki K. 2016 Collapse of Insect  
421 Gut Symbiosis under Simulated Climate Change. **7**, 1–8. (doi:10.1128/mBio.01578-  
422 16.Editor)
- 423 15. Weis VM. 2008 Cellular mechanisms of Cnidarian bleaching: stress causes the collapse of  
424 symbiosis. *Journal of Experimental Biology* **211**, 3059–3066. (doi:10.1242/jeb.009597)

- 425 16. Webster NS, Cobb RE, Negri AP. 2008 Temperature thresholds for bacterial symbiosis with  
426 a sponge. *ISME J* **2**, 830–842. (doi:10.1038/ismej.2008.42)
- 427 17. Kwong W *et al.* 2017 Dynamic microbiome evolution in social bees. *Science Advances* **3**,  
428 e1600513. (doi:10.1126/sciadv.1600513)
- 429 18. Kwong WK, Moran NA. 2016 Gut microbial communities of social bees. *Nature Reviews*  
430 *Microbiology* **14**, 374–384. (doi:10.1038/nrmicro.2016.43)
- 431 19. Cameron SA, Sadd BM. 2020 Global Trends in Bumble Bee Health. *Annu. Rev. Entomol.* **65**,  
432 209–232. (doi:10.1146/annurev-ento-011118-111847)
- 433 20. Potts SG. 2015 Global pollinator declines: Trends, impacts and drivers. *Trends in Ecology*  
434 *and Evolution* **10**, 345–353. (doi:10.1016/j.tree.2010.01.007)
- 435 21. Kerr JT *et al.* 2015 Climate change impacts on bumblebees converge across continents.  
436 *Science* **349**, 177–180. (doi:10.1126/science.aaa7031)
- 437 22. Soroye P, Newbold T, Kerr J. 2020 Climate change contributes to widespread declines  
438 among bumble bees across continents. *Science* **367**, 685–688. (doi:10.1126/science.aax8591)
- 439 23. Powell E, Ratnayeke N, Moran NA. 2016 Strain diversity and host specificity in a  
440 specialized gut symbiont of honeybees and bumblebees. *Molecular Ecology* **25**, 4461–4471.  
441 (doi:10.1111/mec.13787)
- 442 24. Zhang B, Leonard SP, Li Y, Moran NA. 2019 Obligate bacterial endosymbionts limit  
443 thermal tolerance of insect host species. *Proceedings of the National Academy of Sciences*  
444 **116**, 24712–24718. (doi:10.1073/pnas.1915307116)

- 445 25. Heinrich B, Esch H. 1994 Thermoregulation in bees. *American Scientist* **82**, 164–170.
- 446 26. Southwick EE, Heldmaier G. 1987 Temperature Control in Honey Bee Colonies. *BioScience*  
447 **37**, 395–399. (doi:10.2307/1310562)
- 448 27. Heinrich B. 1979 *Bumblebee Economics*. Cambridge, Massachusetts: Harvard University  
449 Press.
- 450 28. Heinrich B. 1972 Energetics of temperature regulation and foraging in a bumblebee, *Bombus*  
451 *terricola* Kirby. *Journal of Comparative Physiology* **77**, 49–64. (doi:10.1007/BF00696519)
- 452 29. Heinrich B. 1972 Patterns of endothermy in bumblebee queens, drones and workers. *J.*  
453 *Comp. Physiol.* **77**, 65–79. (doi:10.1007/BF00696520)
- 454 30. Heinrich B. 1974 Thermoregulation in bumblebees: I. Brood incubation by *Bombus*  
455 *vosnesenskii* queens. *J. Comp. Physiol.* **88**, 129–140. (doi:10.1007/BF00695404)
- 456 31. Tan K, Yang S, Wang Z-W, Radloff SE, Oldroyd BP. 2012 Differences in foraging and  
457 broodnest temperature in the honey bees *Apis cerana* and *A. mellifera*. *Apidologie* **43**, 618–  
458 623. (doi:10.1007/s13592-012-0136-y)
- 459 32. Fahrenholz L, Lamprecht I, Schrick B. 1989 Thermal investigations of a honey bee colony:  
460 thermoregulation of the hive during summer and winter and heat production of members of  
461 different bee castes. *J Comp Physiol B* **159**, 551–560. (doi:10.1007/BF00694379)
- 462 33. Kešnerová L, Emery O, Troilo M, Liberti J, Erkosar B, Engel P. 2020 Gut microbiota  
463 structure differs between honeybees in winter and summer. *ISME J* **14**, 801–814.  
464 (doi:10.1038/s41396-019-0568-8)

- 465 34. Koch H, Abrol DP, Li J, Schmid-Hempel P. 2013 Diversity and evolutionary patterns of  
466 bacterial gut associates of corbiculate bees. *Molecular Ecology* **22**, 2028–2044.  
467 (doi:10.1111/mec.12209)
- 468 35. Powell JE, Martinson VG, Urban-Mead K, Moran NA. 2014 Routes of Acquisition of the  
469 Gut Microbiota of the Honey Bee *Apis mellifera*. *Applied and Environmental Microbiology*  
470 **80**, 7378–7387. (doi:10.1128/AEM.01861-14)
- 471 36. Koch H, Schmid-Hempel P. 2011 Socially transmitted gut microbiota protect bumble bees  
472 against an intestinal parasite. *Proceedings of the National Academy of Sciences* **108**, 19288–  
473 19292. (doi:10.1073/pnas.1110474108)
- 474 37. Palmer-Young EC, Ngor L, Nevarez RB, Rothman JA, Raffel TR, McFrederick QS. 2019  
475 Temperature dependence of parasitic infection and gut bacterial communities in bumble  
476 bees. *Environ Microbiol* **21**, 4706–4723. (doi:10.1111/1462-2920.14805)
- 477 38. Martinson VG, Moy J, Moran NA. 2012 Establishment of characteristic gut bacteria during  
478 development of the honeybee worker. *Applied and Environmental Microbiology* **78**, 2830–  
479 2840.
- 480 39. Michener CD. 1979 Biogeography of the Bees. *Annals of the Missouri Botanical Garden* **66**,  
481 277. (doi:10.2307/2398833)
- 482 40. Kwong WK, Engel P, Koch H, Moran NA. 2014 Genomics and host specialization of honey  
483 bee and bumble bee gut symbionts. *Proceedings of the National Academy of Sciences* **111**,  
484 11509–11514. (doi:10.1073/pnas.1405838111)

- 485 41. Vogt FD. 1986 Thermoregulation in Bumblebee Colonies. I. Thermoregulatory versus  
486 Brood-Maintenance Behaviors during Acute Changes in Ambient Temperature.  
487 *Physiological Zoology* **59**, 55–59.
- 488 42. Gardner KE, Foster RL, O'Donnell S. 2007 Experimental analysis of worker division of  
489 labor in bumblebee nest thermoregulation (*Bombus huntii*, Hymenoptera: Apidae). *Behav*  
490 *Ecol Sociobiol* **61**, 783–792. (doi:10.1007/s00265-006-0309-7)
- 491 43. Weidenmüller A, Kleineidam C, Tautz J. 2002 Collective control of nest climate parameters  
492 in bumblebee colonies. *Animal Behaviour* **63**, 1065–1071. (doi:10.1006/anbe.2002.3020)
- 493 44. Jones JC, Myerscough MR, Graham S, Oldroyd BP. 2004 Honey bee nest thermoregulation:  
494 Diversity promotes stability. *Science* **305**, 402–404. (doi:10.1126/science.1096340)
- 495 45. Steele MI, Kwong WK, Whiteley M, Moran NA. 2017 Diversification of Type VI Secretion  
496 System Toxins Reveals Ancient Antagonism among Bee Gut Microbes. *mBio* **8**, e01630–17.  
497 (doi:10.1128/MBIO.01630-17)
- 498 46. Zheng H, Nishida A, Kwong WK, Koch H, Engel P, Steele MI, Moran NA. 2016  
499 Metabolism of toxic sugars by strains of the bee gut symbiont *Gilliamella apicola*. *mBio* **7**,  
500 e01326–16. (doi:10.1128/mBio.01326-16)
- 501 47. Williams P, Thorp R, Richardson L, Colla S. 2014 *Bumble Bees of North America*.  
502 Princeton, NJ: Princeton University Press.
- 503 48. R Core Team. 2016 *R: A language and environment for statistical computing*. Vienna,  
504 Austria: R Foundation for Statistical Computing. See <http://www.r-project.org>.



- 505 49. Sprouffske K, Wagner A. 2016 Growthcurver: an R package for obtaining interpretable  
506 metrics from microbial growth curves. *BMC Bioinformatics* **17**, 172. (doi:10.1186/s12859-  
507 016-1016-7)
- 508 50. Näpflin K, Schmid-Hempel P. 2018 Host effects on microbiota community assembly.  
509 *Journal of Animal Ecology* **87**, 331–340. (doi:10.1111/1365-2656.12768)
- 510 51. Sauers LA, Sadd BM. 2019 An interaction between host and microbe genotypes determines  
511 colonization success of a key bumble bee gut microbiota member. *Evolution* **73**, 2333–2342.  
512 (doi:10.1111/evo.13853)
- 513 52. Klinger EG, Camp AA, Strange JP, Cox-Foster D, Lehmann DM. 2019 *Bombus*  
514 (Hymenoptera: Apidae) Microcolonies as a Tool for Biological Understanding and Pesticide  
515 Risk Assessment. *Environmental Entomology* **48**, 1249–1259.
- 516 53. Leza M, Watrous KM, Bratu J, Woodard SH. 2018 Effects of neonicotinoid insecticide  
517 exposure and monofloral diet on nest-founding bumblebee queens. *Proceedings of the Royal*  
518 *Society B: Biological Sciences* **285**, 20180761. (doi:10.1098/rspb.2018.0761)
- 519 54. Pinheiro J, Bates D, DebRoy S, Sarkar D, R Core Team. 2019 *Linear and Nonlinear Mixed*  
520 *Effects Models*. See <https://CRAN.R-project.org/package=nlme>.
- 521 55. Palmer-Young EC, Raffel TR, McFrederick QS. In press. Temperature-mediated inhibition  
522 of a bumblebee parasite by an intestinal symbiont. *Proceedings of the Royal Society B* **285**,  
523 20182041. (doi:<http://dx.doi.org/10.1098/rspb.2018.2041>)

- 524 56. Jones JC. 2004 Honey Bee Nest Thermoregulation: Diversity Promotes Stability. *Science*  
525 **305**, 402–404. (doi:10.1126/science.1096340)
- 526 57. Heinrich B. 1976 Heat exchange in relation to blood flow between thorax and abdomen in  
527 bumblebees. *The Journal of experimental biology* **64**, 561–85.
- 528 58. Hamblin AL, Youngsteadt E, López-Uribe MM, Frank SD. 2017 Physiological thermal  
529 limits predict differential responses of bees to urban heat-island effects. *Biology Letters* **13**,  
530 20170125. (doi:10.1098/rsbl.2017.0125)
- 531 59. Oyen KJ, Giri S, Dillon ME. 2016 Altitudinal variation in bumble bee (*Bombus*) critical  
532 thermal limits. *Journal of Thermal Biology* **59**, 52–57. (doi:10.1016/j.jtherbio.2016.04.015)
- 533 60. Kovac H, Käfer H, Stabentheiner A, Costa C. 2014 Metabolism and upper thermal limits of  
534 *Apis mellifera carnica* and *A. m. ligustica*. *Apidologie* **45**, 664–677. (doi:10.1007/s13592-  
535 014-0284-3)
- 536 61. Käfer H, Kovac H, Stabentheiner A. 2012 Upper thermal limits of honeybee (*Apis mellifera*)  
537 and yellowjacket (*Vespula vulgaris*) foragers. *Mitt. Dtsch. Ges. Allg. Angew. Ent.* **18**, 267–  
538 270.
- 539 62. Ken T, Hepburn HR, Radloff SE, Yusheng Y, Yiqiu L, Danyin Z, Neumann P. 2005 Heat-  
540 balling wasps by honeybees. *Naturwissenschaften* **92**, 492–495. (doi:10.1007/s00114-005-  
541 0026-5)
- 542 63. Miller-Struttman NE *et al.* 2015 Functional mismatch in a bumble bee pollination  
543 mutualism under climate change. *Science* **349**, 1541–1544. (doi:10.1126/science.aab0868)

- 544 64. Rasmont P, Iserbyt S. 2012 The Bumblebees Scarcity Syndrome: Are heat waves leading to  
545 local extinctions of bumblebees (Hymenoptera: Apidae: *Bombus*)? *Annales de la Société*  
546 *entomologique de France (N.S.)* **48**, 275–280. (doi:10.1080/00379271.2012.10697776)
- 547 65. Woodard SH. 2017 Bumble bee ecophysiology: integrating the changing environment and  
548 the organism. *Current Opinion in Insect Science* **22**, 101–108.  
549 (doi:10.1016/j.cois.2017.06.001)
- 550 66. Anbutsu H *et al.* 2017 Small genome symbiont underlies cuticle hardness in beetles.  
551 *Proceedings of the National Academy of Sciences* **114**, E8382–E8391.
- 552 67. Engel P, James RR, Koga R, Kwong WK, McFrederick QS, Moran NA. 2013 Standard  
553 methods for research on *Apis mellifera* gut symbionts. *Journal of Apicultural Research* **52**,  
554 1–24. (doi:10.3896/IBRA.1.52.4.07)
- 555 68. Wertz JT, Breznak JA. 2007 *Stenoxybacter acetivorans* gen. nov., sp. nov., an Acetate-  
556 Oxidizing Obligate Microaerophile among Diverse O<sub>2</sub>-Consuming Bacteria from Termite  
557 Guts. *Appl. Environ. Microbiol.* **73**, 6819–6828. (doi:10.1128/AEM.00786-07)
- 558 69. Benjamin P. Oldroyd, Siriwat Wongsiri. 2006 *Asian Honey Bees: Biology, Conservation,*  
559 *and Human Interactions*. Cambridge, Massachusetts: Harvard University Press.
- 560 70. D'Angelo C, Hume BCC, Burt J, Smith EG, Achterberg EP, Wiedenmann J. 2015 Local  
561 adaptation constrains the distribution potential of heat-tolerant *Symbiodinium* from the  
562 Persian/Arabian Gulf. *ISME J* **9**, 2551–2560. (doi:10.1038/ismej.2015.80)

- 563 71. Mueller UG *et al.* 2011 Evolution of cold-tolerant fungal symbionts permits winter  
564 fungiculture by leafcutter ants at the northern frontier of a tropical ant-fungus symbiosis.  
565 *Proceedings of the National Academy of Sciences* **108**, 4053–4056.  
566 (doi:10.1073/pnas.1015806108)
- 567 72. Okada S, Gordon DM. 2001 Host and geographical factors influence the thermal niche of  
568 enteric bacteria isolated from native Australian mammals. *Molecular Ecology* **10**, 2499–  
569 2513. (doi:10.1046/j.0962-1083.2001.01384.x)
- 570 73. Cameron SA. 1985 Brood care by male bumble bees. *Proceedings of the National Academy*  
571 *of Sciences* **82**, 6371–6373. (doi:10.1073/pnas.82.19.6371)
- 572 74. Heinrich B. 1972 Physiology of Brood Incubation in the Bumblebee Queen, *Bombus*  
573 *vosnesenskii*. *Nature* **239**, 223–225.
- 574 75. Kelemen E, Dornhaus A. 2018 Lower temperatures decrease worker size variation but do not  
575 affect fine-grained thermoregulation in bumble bees. *Behav Ecol Sociobiol* **72**, 170.  
576 (doi:10.1007/s00265-018-2577-4)
- 577 76. O'Donnell S, Foster RL. 2001 Thresholds of Response in Nest Thermoregulation by Worker  
578 Bumble Bees, *Bombus bifarius nearcticus* (Hymenoptera: Apidae). *Ethology* **107**, 387–399.  
579 (doi:10.1046/j.1439-0310.2001.00668.x)
- 580 77. Livesey JS *et al.* 2019 The power and efficiency of brood incubation in queenless  
581 microcolonies of bumble bees (*Bombus terrestris* L.). *Ecol Entomol* **44**, 601–609.  
582 (doi:10.1111/een.12736)

- 583 78. Burke G, Fiehn O, Moran N. 2010 Effects of facultative symbionts and heat stress on the  
584 metabolome of pea aphids. *ISME Journal* **4**, 242–252. (doi:10.1038/ismej.2009.114)
- 585 79. Ma L, Calfee BC, Morris JJ, Johnson ZI, Zinser ER. 2018 Degradation of hydrogen peroxide  
586 at the ocean’s surface: the influence of the microbial community on the realized thermal  
587 niche of *Prochlorococcus*. *ISME J* **12**, 473–484. (doi:10.1038/ismej.2017.182)
- 588 80. Bordenstein SR, Bordenstein SR. 2011 Temperature Affects the Tripartite Interactions  
589 between Bacteriophage WO, *Wolbachia*, and Cytoplasmic Incompatibility. *PLoS ONE* **6**,  
590 e29106. (doi:10.1371/journal.pone.0029106)
- 591 81. Marquez LM, Redman RS, Rodriguez RJ, Roossinck MJ. 2007 A Virus in a Fungus in a  
592 Plant: Three-Way Symbiosis Required for Thermal Tolerance. *Science* **315**, 513–515.  
593 (doi:10.1126/science.1136237)
- 594 82. Deboutte W, Beller L, Yinda CK, Maes P, de Graaf DC, Matthijnsens J. 2020 Honey-bee–  
595 associated prokaryotic viral communities reveal wide viral diversity and a profound  
596 metabolic coding potential. *Proc Natl Acad Sci USA* **117**, 10511–10519.  
597 (doi:10.1073/pnas.1921859117)
- 598 83. Bonilla-Rosso G, Steiner T, Wichmann F, Bexkens E, Engel P. 2020 Honey bees harbor a  
599 diverse gut virome engaging in nested strain-level interactions with the microbiota. *Proc*  
600 *Natl Acad Sci USA* **117**, 7355–7362. (doi:10.1073/pnas.2000228117)
- 601 84. Crall JD *et al.* 2018 Neonicotinoid exposure disrupts bumblebee nest behavior, social  
602 networks, and thermoregulation. *Science* **362**, 683–686. (doi:10.1126/science.aat1598)

603 85. Lemoine MM, Engl T, Kaltenpoth M. 2020 Microbial symbionts expanding or constraining  
604 abiotic niche space in insects. *Current Opinion in Insect Science* **39**, 14–20.

605 (doi:10.1016/j.cois.2020.01.003)

606 86. Lewis Z, Lizé A. 2015 Insect behaviour and the microbiome. *Current Opinion in Insect*  
607 *Science* **9**, 86–90. (doi:10.1016/j.cois.2015.03.003)

608 87. Sherwin E, Bordenstein SR, Quinn JL, Dinan TG, Cryan JF. 2019 Microbiota and the social  
609 brain. *Science* **366**, eaar2016. (doi:10.1126/science.aar2016)

610

611 **Figures**

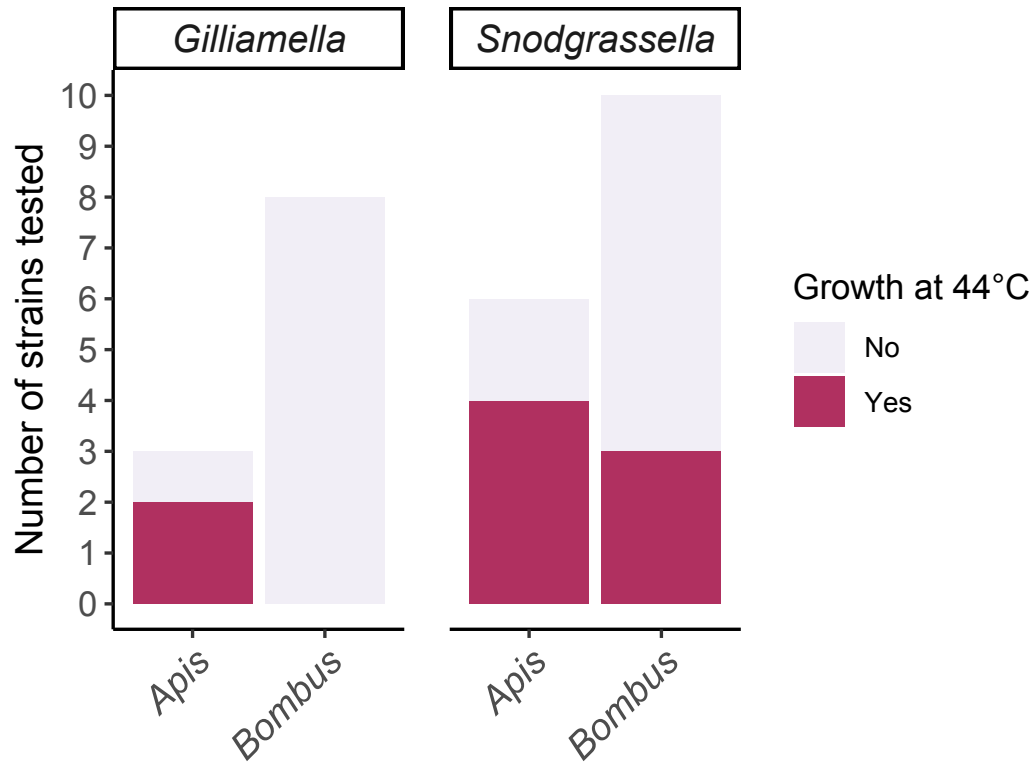

612  
613

614 Figure 1. Ability of strains of two core bee gut symbionts, *Gilliamella* and *Snodgrassella*, to  
615 grow after 48 h incubation on solid media at 44 °C. Honeybee (*Apis*) strains tend to be better  
616 able to grow at this temperature than bumblebee (*Bombus*) strains. Thermal limits broken down  
617 by host species of origin are shown in Fig. S1.

618

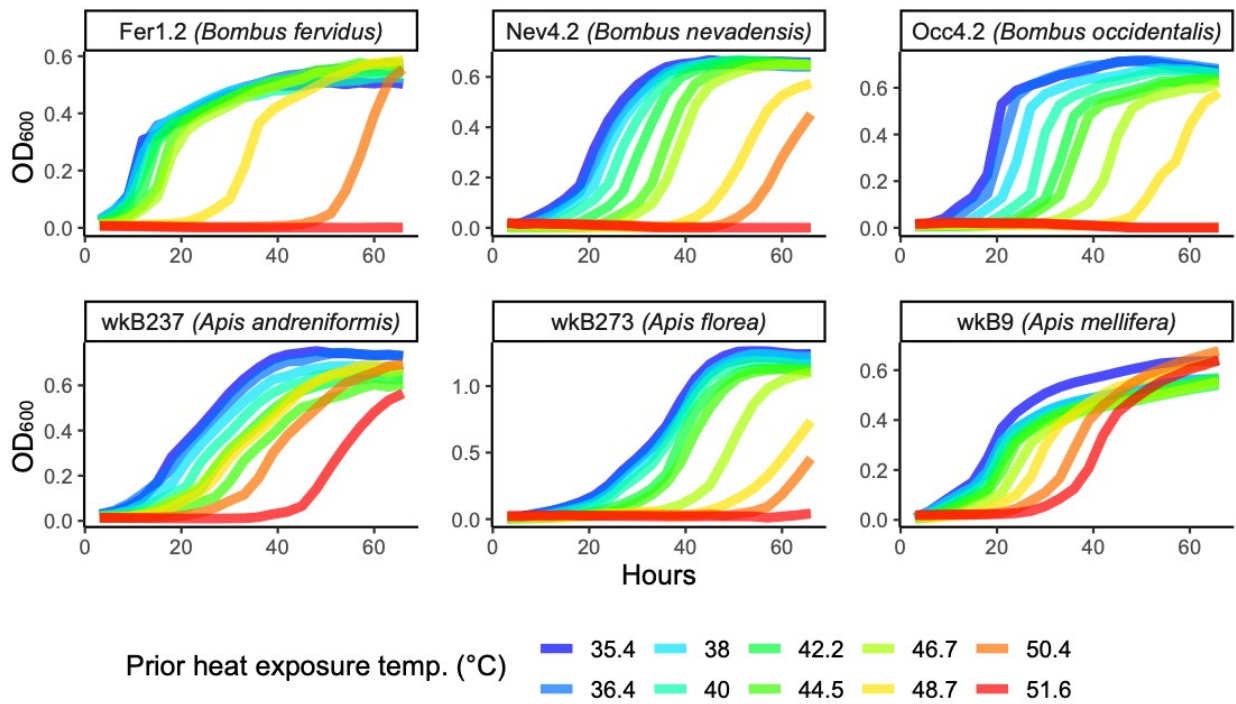

619

620

621 Figure 2. *In vitro* growth of the core bee gut symbiont *Snodgrassella* following short-term  
622 exposure to high temperatures. Curves represent growth at 35 °C and 5% CO<sub>2</sub> following a 1 h  
623 heat stress treatment applied using a gradient thermocycler, showing the mean OD<sub>600</sub> values of  
624 three replicates per strain per temperature. The host species from which each strain was isolated  
625 is indicated. *Snodgrassella* is generally robust to high temperatures, though tolerance varied  
626 among strains. Only two *Apis*-associated isolates were able to recover from 51.6 °C, the  
627 maximum temperature tested.

628

629



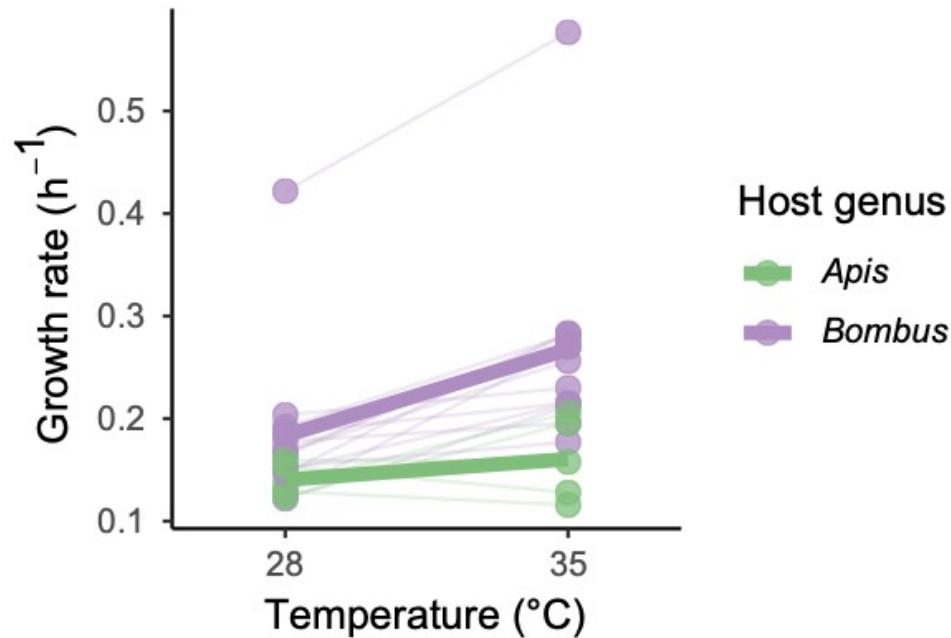

630

631

632 Figure 3. *In vitro* growth rates of *Snodgrassella* strains at 28 °C and 35 °C. Dots connected by  
633 thin lines represent the maximum growth rates of each strain, colored by whether the strains were  
634 isolated from honeybees (*Apis*) or bumblebees (*Bombus*). Thick lines connect the median growth  
635 rate for *Apis* or *Bombus* strains at each incubation temperature. All bumblebee *Snodgrassella*  
636 grow faster at 35 °C, a temperature significantly higher than typical bumblebee nests. N = 5 *Apis*  
637 strains, N = 15 *Bombus* strains.

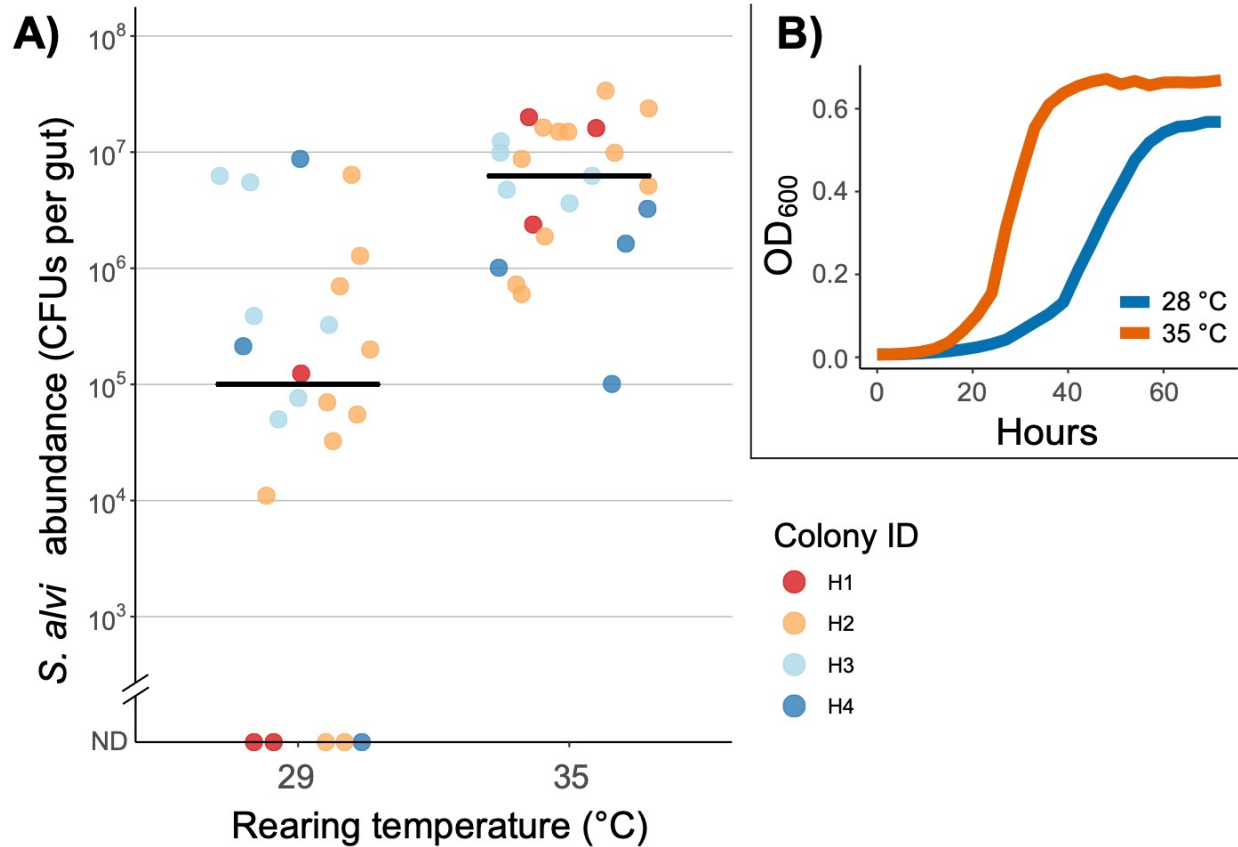

638

639

640 Figure 4. A) Effects of the thermal environment on colonization of *Snodgrassella alvi* wkB12 in  
641 gnotobiotic bumblebee workers (*Bombus impatiens*). Inoculated bees were maintained for 5 d at  
642 29 °C, a typical temperature in *B. impatiens* nests (N = 22), or 35 °C (N = 23). Colors indicate  
643 the four replicate colonies that were used for the experiment, and black bars indicate the median  
644 *Snodgrassella* titer for each temperature treatment. Bees fed a sterile buffer and maintained  
645 under the same conditions had no detectable *Snodgrassella* colonization (not shown). CFUs =  
646 colony-forming units; ND = not detected. B) Growth of *Snodgrassella alvi* wkB12 *in vitro* when  
647 incubated at 28 °C versus 35 °C. Growth curves represent the mean OD<sub>600</sub> values of three  
648 replicates per temperature.

649

650

651 **Supplemental Figures**

652

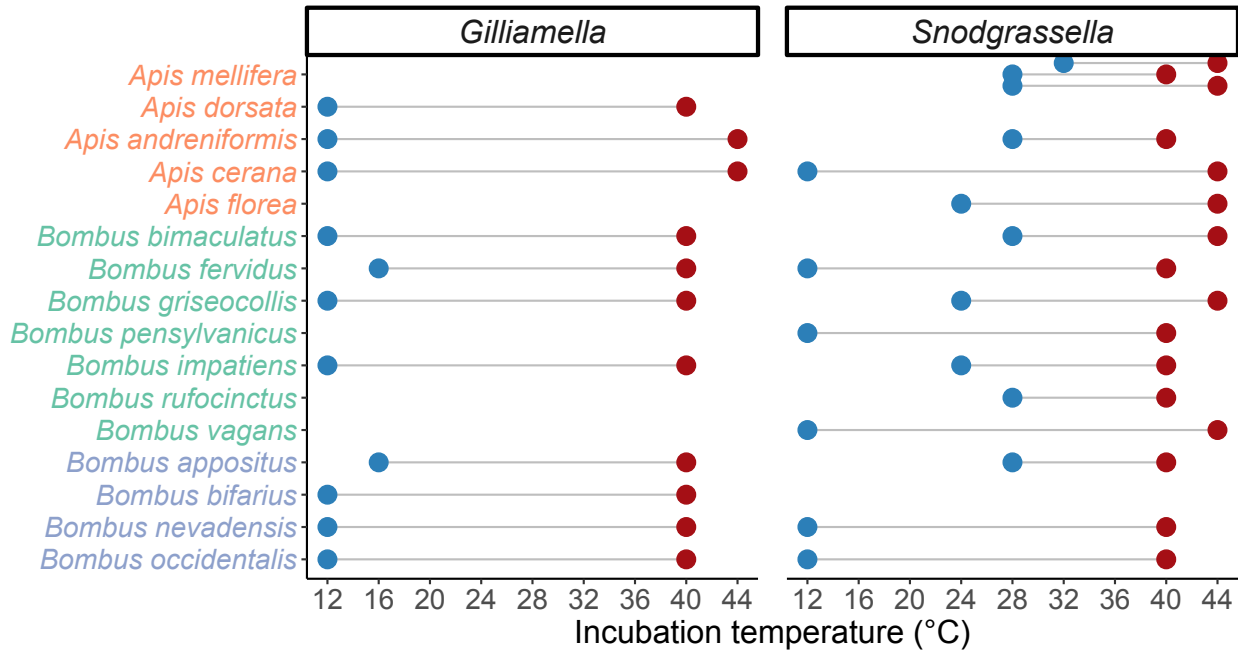

653

654 **Figure S1.** Thermal limits to growth *in vitro* for two bee gut symbiont species. Dots represent the

655 minimum and maximum temperatures at which a given strain exhibited growth after 48 h of

656 incubation on solid media. No growth was evident for any strain at 48 °C, and temperatures

657 below 12 °C were not tested. Aside from *Apis mellifera*, from which three *Snodgrassella* isolates

658 were assayed, one symbiont isolate per host species was assayed; note that blank spaces indicate

659 untested host/symbiont combinations. The four bumble bee host species that typically inhabit

660 high-elevation habitats are labeled in blue at the bottom of the plot. Lower limits to growth

661 should be considered as minimum estimates of cold tolerance, given the sensitivity of this metric

662 to the starting inoculum size (see Results).

663

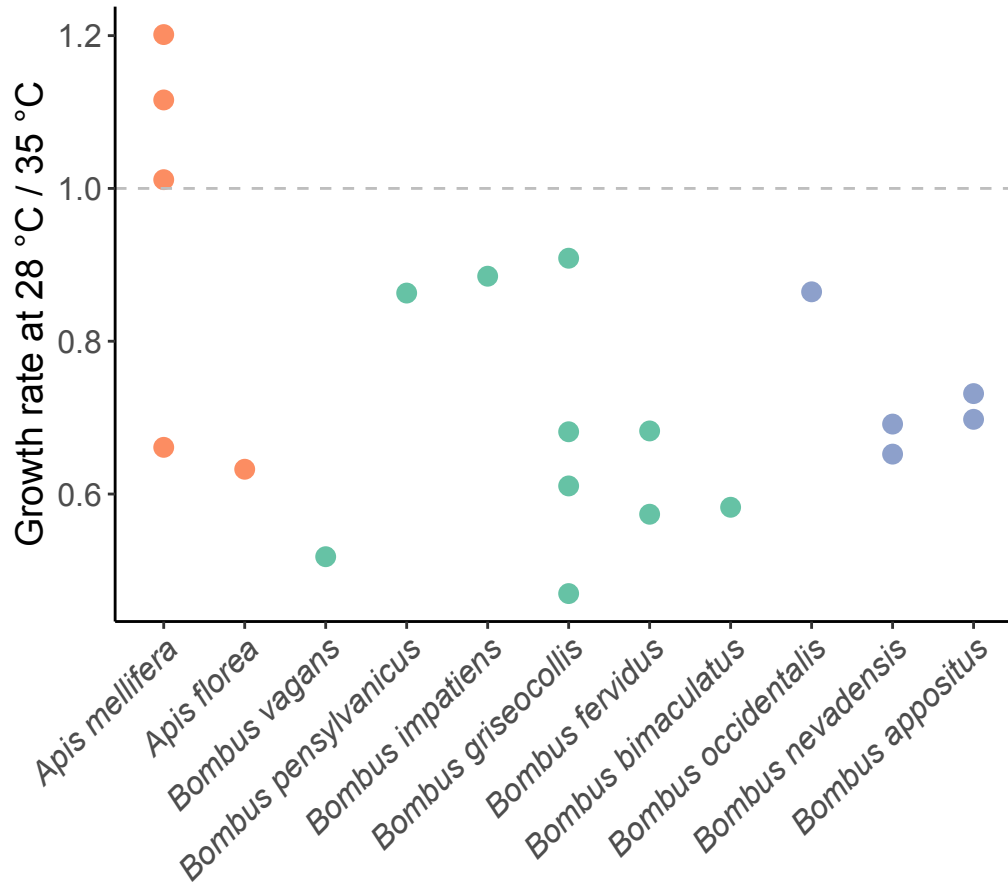

664

665 Figure S2. Growth rates of *Snodgrassella* at 28 °C versus 35 °C *in vitro*. The dashed line  
666 indicates equivalent growth rates between the two temperatures. Dots represent individual  
667 *Snodgrassella* strains, and strains from bumble bee species that typically inhabit high-elevation  
668 habitats are labeled in blue. The one *A. mellifera*-derived strain that grew faster at 35 °C is  
669 wkB2, which has been frequently cultured in the laboratory at 35 °C (see Methods). Its thermal  
670 performance may therefore reflect laboratory evolution.

671

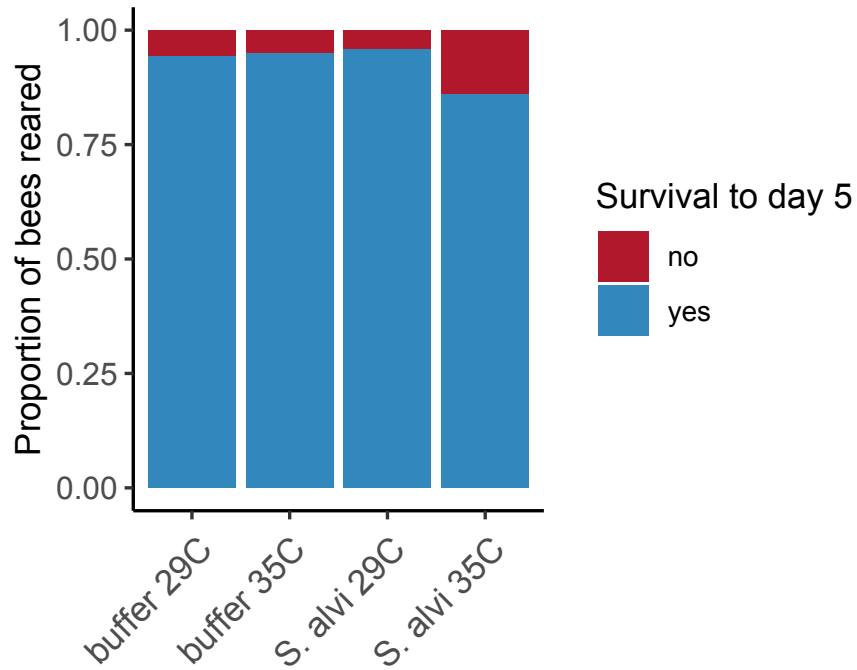

672

673 Figure S3. Survival outcomes of gnotobiotic bumble bees from adult emergence through five  
674 days of rearing. Number of bees inoculated with buffer alone: 18 at 29 °C, 20 at 35 °C. Number  
675 of bees inoculated with *Snodgrassella alvi* wkB12: 25 at 29 °C, 29 at 35 °C.
